# Supplementary material for: A climatology of sub-seasonal temporal clustering of extreme precipitation in Switzerland and its impacts
Source: Copernicus journal article supplement (doi:10.5194/nhess-2021-93), 2021-04-06
Supplement: Supplementary file [file nhess-2021-93-AC1-supplement.pdf]

## Major comments

### Comment 1: Title

"...and its impact" As far as I can see, you only assess the importance of clustering with regard to streamflow peaks. What are the other impacts? In the discussion you mention "surface impact", but still do not specify.

The original title was a bit broad indeed and to make it more to the point, we suggest the following: "*A climatology of sub-seasonal temporal clustering of extreme precipitation in Switzerland and its links to extreme discharge*".

### Comment 2: Persistent floods

For large parts of the manuscript, I was not sure what you mean by 'persistent floods'. Please consider to explain this earlier in the manuscript (introduction?) with one or two sentences. The definition only is given in section 2.2.3, but the term is used a couple of times before already. Furthermore, I am a bit confused about the definition itself. I did not fully understand it yet, I think. The 99th percentile means that 1 % of the values/days get selected. Doesn't it on an annual level mean that (depending on how you estimate the percentiles; how do you sample them by the way?) you only have 3-4 flood days per year? How can there then be 10 flood days in a 30 day period then? And how is it possible that  $L < N$ ? Isn't L a time period in days and N the number of flood days in this time period? Please clarify.

The manuscript was indeed confusing on the issue of "persistent floods" and the wording has to be modified. Instead of "persistent floods" it is better to speak of "persistent high-discharge periods". To speak of "events" may be deceitful since we do not identify specific events with a beginning and end; our metric for persistent high discharge includes long-lived extreme discharge events but also recurrent, independent events. We also removed any reference to persistent high-discharge events before introducing their definition in the methods section.

It is true that the 99<sup>th</sup> percentile of daily discharge is exceeded on average only ~3 times per year. However, the occurrence of extreme discharge events is not homogeneously distributed in time. Discharge series indeed exhibit strong temporal autocorrelation. In addition, clusters of precipitation extremes (as we show in this work) likely cause repeated exceedances of extreme discharge thresholds over short periods of time.

L and N were also in the wrong order and we corrected the mistake ( $L > N$ ).

Another question in this regard: When does a year start and end in your case? Do you consider the hydrological year for Switzerland? Consider to change the section title in 2.2.3 to 'Persistent flood events'.

We do not need to define the beginning and end of a year in our analysis. Discharge percentiles are calculated using the entire available series and remain the same for all time steps.

Is there a specific reason why you choose the 99th and the 95th percentile? You refer to these events as 'floods'. However, runoff above the 95th percentile on an annual basis does not necessarily cause flooding. On 5 % of the days this value (~18 days every year) is crossed, right? Please consider to pick up this point in the discussion section.

These two percentiles are used to define extreme discharge events, but of course other values could be used too. The 95<sup>th</sup> percentile may be a bit low to speak of “extreme” discharge, but its advantage is that it allows to select more events compared to the 99<sup>th</sup> percentile. Still, the comparison of results between the two percentiles generally shows good agreement (Figures 9, 11-13).

You are also correct to point out that flooding does not necessarily occur when extreme discharge thresholds are crossed. The choice of the word “flood” in the initial manuscript version was confusing and we decided to change it to “extreme discharge”.

### Comment 3: Catchments

I am somehow missing a better overview on the catchments investigated. Something like a table (or overview graph?) summarizing information on gauge locations, names, catchment areas, discharge data availability,... Please provide more information on how you selected this set of catchments? Why does it fit to your type of analysis? Why do you need catchments with glacial, nival and pluvial regimes? Also I do not see what time frame was considered for the different watersheds. It is a bit confusing that in Fig.1 DEM and catchments have both black lines as boundaries. Also some catchments reach outside the DEM/Switzerland. There the DEM does not cover. River gauges usually are marked with reversed triangles, I think. Maybe you can color the catchment areas according to their mean elevation?

We will add the following supplementary table containing catchment characteristics:

**Table A1.** List and main characteristics of the 93 gauged Swiss catchments used in this study.

| ID   | station     | river       | area (km <sup>2</sup> ) | mean altitude (masl) | min altitude (masl) | max altitude (masl) | glaciation (%) |
|------|-------------|-------------|-------------------------|----------------------|---------------------|---------------------|----------------|
| 2020 | Bellinzona  | Ticino      | 1517.5                  | 1679                 | 220                 | 3345                | 0              |
| 2033 | Ilanz       | Vorderrhein | 774                     | 2026                 | 685                 | 3557                | 1.8            |
| 2034 | Payerne     | Broye       | 415.9                   | 724                  | 368                 | 1574                | 0              |
| 2044 | Andelfingen | Thur        | 1701.6                  | 773                  | 354                 | 2431                | 0              |
| 2056 | Seedorf     | Reuss       | 833.2                   | 2005                 | 432                 | 3598                | 6.4            |
| 2070 | Emmenmatt   | Emme        | 443                     | 1072                 | 562                 | 2161                | 0              |
| 2078 | Le Prese    | Poschiavino | 167.7                   | 2161                 | 962                 | 3875                | 3.9            |

|      |                     |                    |        |      |      |      |      |
|------|---------------------|--------------------|--------|------|------|------|------|
| 2084 | Ingenbohl           | Muota              | 316.6  | 1364 | 425  | 2731 | 0    |
| 2087 | Andermatt           | Reuss              | 190.2  | 2276 | 1125 | 3598 | 2.9  |
| 2104 | Weesen              | Linth              | 1061.5 | 1580 | 416  | 3557 | 1.6  |
| 2106 | Muenchenstein       | Birs               | 887.3  | 733  | 256  | 1424 | 0    |
| 2112 | Appenzell           | Sitter             | 74.4   | 1254 | 445  | 2431 | 0    |
| 2122 | Moutier             | Birse              | 185.8  | 927  | 493  | 1424 | 0    |
| 2126 | Waengi              | Murg               | 80.1   | 654  | 456  | 1113 | 0    |
| 2132 | Neftenbach          | Toess              | 343.3  | 659  | 380  | 1298 | 0    |
| 2141 | Tiefencastel        | Albula             | 529    | 2127 | 837  | 3317 | 0.5  |
| 2151 | Oberwil             | Simme              | 343.7  | 1639 | 778  | 3208 | 2.4  |
| 2155 | Wiler               | Emme               | 924.1  | 871  | 430  | 2161 | 0    |
| 2159 | Belp                | Guerbe             | 116.1  | 849  | 508  | 2128 | 0    |
| 2160 | Broc                | Sarine             | 636.3  | 1501 | 674  | 3207 | 0    |
| 2167 | Ponte Tresa         | Tresa              | 609.1  | 805  | 198  | 2207 | 0    |
| 2176 | Zuerich             | Sihl               | 342.6  | 1047 | 402  | 2223 | 0    |
| 2179 | Thoerishaus         | Sense              | 351.2  | 1076 | 524  | 2182 | 0    |
| 2181 | Halden              | Thur               | 1085   | 914  | 445  | 2431 | 0    |
| 2185 | Chur                | Plessur            | 264.4  | 1865 | 545  | 2923 | 0    |
| 2202 | Liestal             | Ergolz             | 261.2  | 591  | 296  | 1181 | 0    |
| 2203 | Aigle               | Grande Eau         | 131.6  | 1566 | 384  | 3167 | 0.8  |
| 2210 | Ocourt              | Doubs              | 1275.4 | 960  | 407  | 1448 | 0    |
| 2219 | Oberried            | Simme              | 34.7   | 2335 | 1075 | 3208 | 22.6 |
| 2232 | Adelboden           | Allenbach          | 28.8   | 1855 | 1093 | 2833 | 0    |
| 2256 | Pontresina          | Rosegbach          | 66.5   | 2701 | 1720 | 3981 | 21.7 |
| 2262 | Pontresina          | Berninabach        | 106.9  | 2608 | 1783 | 3981 | 14.4 |
| 2270 | Combe des Sarrasins | Doubs              | 998.5  | 985  | 553  | 1448 | 0    |
| 2276 | Isenthal            | Grosstalbach       | 43.9   | 1810 | 767  | 2961 | 6.7  |
| 2299 | Erstfeld            | Alpbach            | 20.7   | 2181 | 629  | 3129 | 19.7 |
| 2300 | Euthal              | Minster            | 59.1   | 1352 | 642  | 2223 | 0    |
| 2303 | Jonschwil           | Thur               | 492.9  | 1027 | 535  | 2431 | 0    |
| 2304 | Zernez              | Ova dal Fuorn      | 55.3   | 2333 | 1666 | 3114 | 0    |
| 2305 | Herisau             | Glatt              | 16.7   | 836  | 624  | 1145 | 0    |
| 2307 | Sonceboz            | Suze               | 127.2  | 1044 | 634  | 1595 | 0    |
| 2308 | Goldach             | Goldach            | 50.4   | 840  | 391  | 1245 | 0    |
| 2312 | Salmsach            | Aach               | 47.4   | 476  | 391  | 609  | 0    |
| 2319 | Zernez              | Ova da Cluozza     | 26.9   | 2361 | 1468 | 3115 | 0    |
| 2321 | Pregassona          | Cassarate          | 75.8   | 991  | 272  | 2198 | 0    |
| 2342 | Brig                | Saltina            | 76.5   | 2017 | 661  | 3407 | 2.5  |
| 2343 | Huttwil             | Langeten           | 59.9   | 765  | 566  | 1123 | 0    |
| 2355 | Davos               | Landwasser         | 183.7  | 2223 | 1453 | 3180 | 0    |
| 2356 | Cavergno            | Riale di Calneggia | 23.9   | 1982 | 645  | 2866 | 0    |
| 2366 | La Roesa            | Poschiavino        | 14.1   | 2286 | 1707 | 3012 | 0    |
| 2368 | Locarno             | Maggia             | 926.9  | 1534 | 191  | 3208 | 0    |
| 2369 | Yvonand             | Mentue             | 105.3  | 683  | 436  | 946  | 0    |
| 2370 | Le Noirmont         | Doubs              | 1046.7 | 985  | 503  | 1448 | 0    |

|      |              |                    |       |      |      |      |      |
|------|--------------|--------------------|-------|------|------|------|------|
| 2372 | Mollis       | Linth              | 600.2 | 1737 | 427  | 3557 | 2.9  |
| 2374 | Mogelsberg   | Necker             | 88.1  | 962  | 604  | 1513 | 0    |
| 2386 | Frauenfeld   | Murg               | 213.3 | 596  | 381  | 1113 | 0    |
| 2409 | Eggiwil      | Emme               | 124.4 | 1283 | 562  | 2161 | 0    |
| 2412 | Vuippens     | Sionge             | 43.4  | 872  | 674  | 1457 | 0    |
| 2415 | Rheinsfelden | Glatt              | 417.4 | 506  | 340  | 1105 | 0    |
| 2419 | Reckingen    | Rhone              | 214.3 | 2301 | 1307 | 3598 | 11.8 |
| 2420 | Lumino       | Moesa              | 471.9 | 1668 | 229  | 3169 | 0    |
| 2426 | Mels         | Seez               | 106.1 | 1796 | 469  | 3073 | 0    |
| 2432 | Ecublens     | Venoge             | 227.6 | 694  | 372  | 1662 | 0    |
| 2434 | Olten        | Duennern           | 233.8 | 714  | 390  | 1383 | 0    |
| 2450 | Zofingen     | Wigger             | 366.2 | 662  | 419  | 1393 | 0    |
| 2461 | Magliaso     | Magliasina         | 34.4  | 927  | 269  | 1904 | 0    |
| 2468 | St. Gallen   | Sitter             | 261.1 | 1045 | 445  | 2431 | 0    |
| 2469 | Hondrich     | Kander             | 490.7 | 1846 | 558  | 3675 | 5.1  |
| 2471 | Murgenthal   | Murg               | 183.4 | 659  | 410  | 1123 | 0    |
| 2474 | Buseno       | Calancasca         | 120.5 | 1930 | 503  | 3169 | 0.2  |
| 2477 | Zug          | Lorze              | 100.2 | 822  | 411  | 1556 | 0    |
| 2478 | Soyhieres    | Birse              | 569.5 | 811  | 380  | 1424 | 0    |
| 2479 | Delemont     | Sorne              | 213.9 | 785  | 408  | 1326 | 0    |
| 2480 | Boudry       | Areuse             | 377.7 | 1084 | 427  | 1573 | 0    |
| 2481 | Buochs       | Engelberger Aa     | 228   | 1605 | 432  | 3137 | 2.5  |
| 2486 | Vevey        | Veveyse            | 64.5  | 1108 | 372  | 1959 | 0    |
| 2487 | Werthenstein | Kleine Emme        | 311.5 | 1171 | 525  | 2290 | 0    |
| 2491 | Buerglen     | Schaechen          | 107.9 | 1722 | 436  | 3221 | 1.5  |
| 2493 | Gland        | Promenthouse       | 119.8 | 1035 | 372  | 1667 | 0    |
| 2494 | Pollegio     | Ticino             | 443.8 | 1794 | 277  | 3120 | 0    |
| 2497 | Nebikon      | Luthern            | 104.7 | 754  | 474  | 1393 | 0    |
| 2498 | Castrisch    | Glenner            | 380.9 | 2014 | 685  | 3345 | 1.1  |
| 2500 | Ittigen      | Worble             | 67.1  | 678  | 494  | 954  | 0    |
| 2603 | Langnau      | Ilfis              | 187.4 | 1047 | 681  | 2045 | 0    |
| 2604 | Biberbrugg   | Biber              | 31.9  | 1008 | 602  | 1515 | 0    |
| 2605 | Lavertezzo   | Verzasca           | 185.1 | 1663 | 463  | 2837 | 0    |
| 2607 | Oberwald     | Goneri             | 38.4  | 2378 | 1353 | 3120 | 4    |
| 2609 | Einsiedeln   | Alp                | 46.7  | 1161 | 660  | 1783 | 0    |
| 2610 | Vicques      | Scheulte           | 72.7  | 797  | 419  | 1292 | 0    |
| 2612 | Lavertezzo   | Riale di Pincascia | 44.5  | 1713 | 463  | 2520 | 0    |
| 2617 | Muestair     | Rom                | 128.5 | 2188 | 1167 | 3196 | 0    |
| 2629 | Agno         | Vedeggio           | 99.9  | 921  | 198  | 2198 | 0    |
| 2630 | Sion         | Sionne             | 27.6  | 1575 | 485  | 3084 | 0    |
| 2634 | Emmen        | Kleine Emme        | 478.3 | 1058 | 425  | 2290 | 0    |

Catchment selection was performed by Muelchi et al. (2021) based on several criteria: data availability, the absence of major lakes, minimal human influence and satisfactory calibration results in their hydrological model. The fact that these catchments are somewhat well

distributed across Switzerland and cover the range of climates and hydrological regimes that is typical of this country is an advantage, since it allows us to explore the potential role of extreme precipitation temporal clustering across regions, climates and hydrological regimes, and to see the limits of our analysis.

Figure 1 can also be updated to show the elevation beyond the Switzerland border, and to better show catchment boundaries and gauge locations (see Figure S1 below).

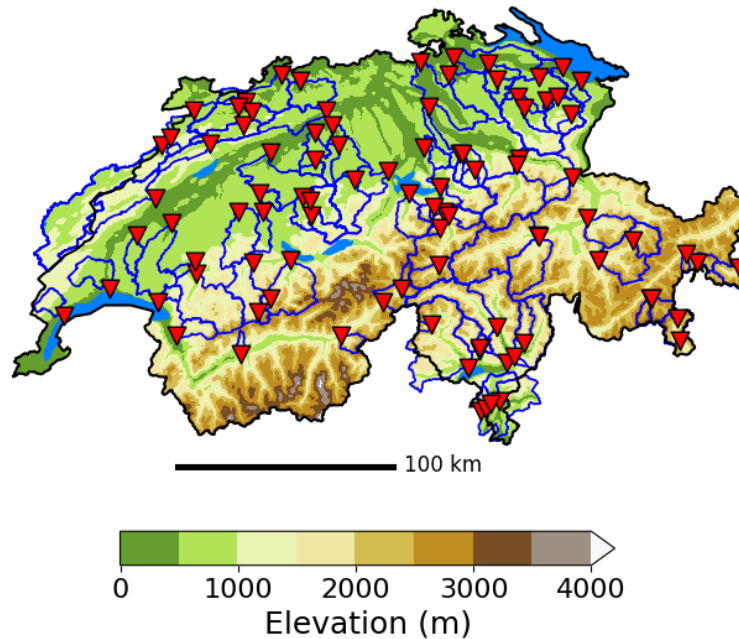

Figure S1 – Topography of Switzerland (shading, with major lakes shown in light blue) and gauged catchments used in this study (catchment boundary: blue lines; catchment gauge location: red triangles). The thick black line indicates the Swiss border.

#### **Comment 4: Comparison precipitation data sets**

The comparison of different gridded data sets is an interesting point of your study and should be already mentioned in the objectives at the end of the introduction. I think it could be interesting to see maps of Ripley's K value (Fig. 6 with K on grid level) of the different data sets in their original resolution. Please consider to try such a figure.

The manuscript includes quite a lot of figures already, but we could add such a figure to the appendix (see Figure S2 below).

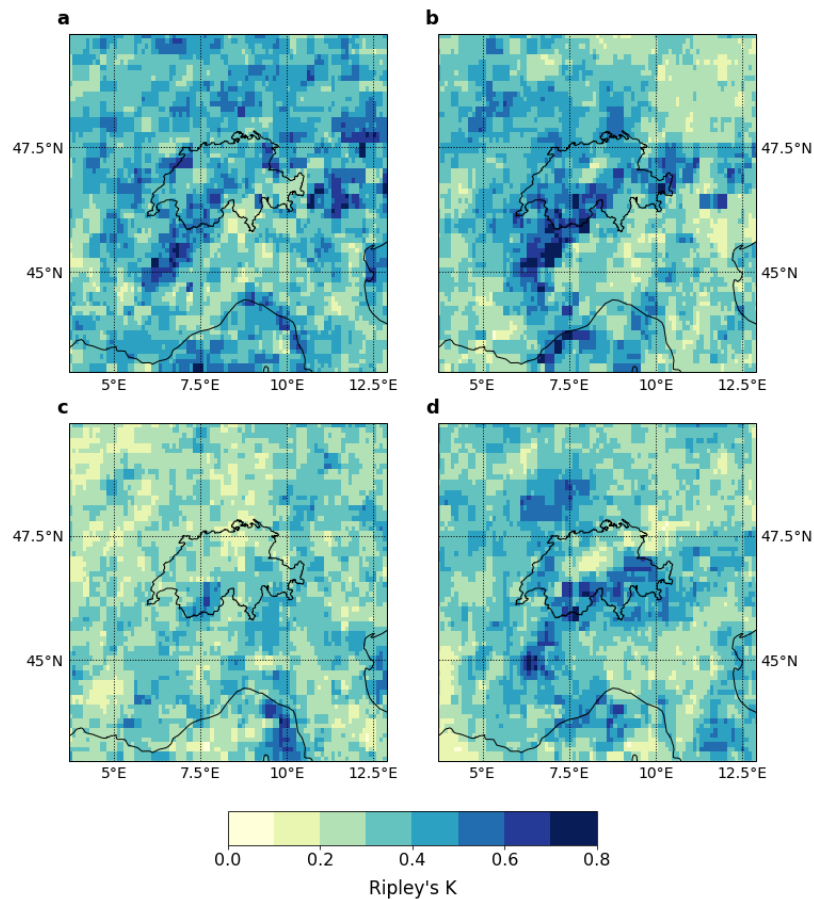

Figure S2 – Average Ripley’s K value for a 20-day window across ERA5, TRMM, CMORPH, CPC and EOBS in (a) DJF, (b) MAM, (c) JJA and (d) SON. For this comparison, all datasets were regridded to the smallest 0.1° EOBS resolution.

### Comment 5: Scheme for methods

In my opinion, a scheme depicting your approach on how to detect temporal clusters in precipitation/discharge would help the reader to understand the methods faster and easier.

We suggest expanding the cluster period identification method to make it clearer: “We identify extreme precipitation cluster events over 21-day time windows with the algorithm of Kopp et al. 2021 (see their Figures 3 and 4). Starting from the declustered binary extreme event series, the first step is to calculate the 21-day moving sum of extreme event counts. In a second step, we select the 21-day period with the largest event count, if that sum is larger than 2. Otherwise, no clusters are found and the algorithm stops. In the case of multiple 21-day periods with the same extreme event count, the one with the largest precipitation total is selected first. In the third step, we remove from the binary event series the extreme events that occur in the selected 21-day period. The algorithm is then run again from the first step onwards to identify the next cluster event. This procedure avoids any overlap between cluster events. The choice of the 21-day time window is well-suited to quantify clustering at sub-seasonal timescales, and is generally consistent with the length of observed cluster episodes that led to major floods in Switzerland (see introduction). Results do not differ significantly

*for slightly shorter or longer (2-4 weeks) windows (see also Kopp et al. 2021).*

*We then characterize clusters of precipitation extremes with two metrics related to their potential impact. The first is the average contribution of cluster periods to seasonal precipitation. This contribution increases with the frequency and total precipitation of cluster periods. The second metric is the frequency of cluster periods during extreme 21-day precipitation accumulations. It gives an idea of how often cluster periods are responsible for extreme precipitation accumulations, a frequent trigger of flood events (Froidevaux et al. 2015).”*

Please explain in more detail how you calculate percentiles on a monthly basis for precipitation. Do you take only days with rainfall into account or all days (also the days with no rain)?

Regarding precipitation percentiles and the definition of extreme precipitation events, we suggest the following revision at the beginning of the methods section: “*For each dataset, precipitation extremes are defined on a monthly basis as days when daily accumulated precipitation exceeds the 99th percentile of the corresponding month. For instance, January precipitation values are compared to the January 99th percentile. The percentiles are calculated using all days (both with and without precipitation).*”

I do not really get the selection of timescales presented Page 4 Line 123. Please consider to extend the explanation on the timescale 5-15 etc.

The selection of timescales for clustering significance is motivated by our focus on sub-seasonal timescales. Please see the revised section 2.3.2:

*Temporal clustering of precipitation extremes is quantified with Ripley’s K function (Ripley, 1981). We give here a quick overview of the methodology and refer the reader to Tuel and Martius (2021) for further details. For a given window size  $w$ , Ripley’s K function applied to a time series measures the average number of extreme events in a neighbourhood of  $w$  days before and after a random extreme event in the series. This gives information about the tendency towards temporal clustering in the series. The larger the value of Ripley’s K function for a given  $w$ , the more clustered the extreme events. The significance of temporal clustering in the series is then assessed by comparing Ripley’s K values to those obtained from a Monte-Carlo sample of 5000 simulated homogeneous Poisson processes with the same average event density as the observed series. In homogeneous Poisson processes, events occur independently from each other and therefore exhibit complete temporal randomness. Because we chose monthly percentiles to define extreme precipitation events, the occurrence rate of extremes is constant throughout the year. Thus we can test for clustering significance against homogeneous series. Non-homogeneous (and more complex) series would have been required if the likelihood of extreme event occurrence has been a function of time.*

*From this comparison we get an empirical p-value for each  $w$ . As we deal with multiple hypothesis tests, we implement a false discovery rate procedure (Wilks, 2016) with a baseline*

significance level of 5% to identify catchments where clustering is significant. Clustering significance is assessed for two intervals of  $w$  values, characteristic of sub-seasonal timescales: 15-25 and 25-35 days. Clustering is said to be significant for a given interval if it is significant for at least half of the  $w$  values in that interval.

Also consider to compare your precipitation clusters to regular precipitation accumulation periods presented in Froideveaux et al 2015: <https://doi.org/10.5194/hess-19-3903-2015>. What is the difference? Is the performance in explaining flooding better?

Froidevaux et al. (2015) did not exactly look at the same kind of events as we do (they looked at annual discharge maxima, whereas we look at all exceedances of given discharge percentiles). They also did not consider the issue of flood duration. Still, they found that precipitation accumulations in the 1-2 days before annual peak discharge events were most critical in explaining these events. This is consistent with our results showing a strong discharge response peaking one day after extreme precipitation events, whether clustered on non-clustered (Figure 13). We have added the following sentence to the discussion: “*The discharge response to both clustered and non-clustered extreme precipitation events typically peaks one day after the event (Figure Fig\_13), consistent with the findings of Froidevaux et al. (2015).*”

#### **Comment 6: Structure**

There is a bit of a mix between results and discussion, I think (see specific comments). The structure of the discussion could follow the result section. Would make it easier to read, I think.

We considerably modified the manuscript structure in response to reviews and hope that the new version will be easier to follow. In particular, one issue with the original version of the manuscript is the discussion of the seasonality in extreme precipitation and discharge magnitudes which did not belong to the results. Instead, this discussion mostly brings together elements from previous studies and we prefer to move it to the data/methods section when introducing the area of study. That way, the results and discussion sections can focus on the clustering and links to extreme discharge only.

In the discussion, you focus a lot on physical interpretation (4.1). However, I am not sure whether your study provides enough new information that allow to support/challenge any of those hypotheses. There is no need to remove it, but maybe focus more on the discussion of your actual analysis.

It is difficult to discuss the patterns of significance in spatial clustering without questioning their physical interpretation. Our study does provide new information regarding the spatio-temporal patterns of clustering significance in Switzerland, so it is worthwhile to spend some time discussing potential mechanisms. Still, we agree that the reference to the NAO and



atmospheric rivers goes beyond the scope of our discussion and we removed the corresponding sentences.

In line 291 and following you discuss flood risk. You do not address exposure and vulnerability at all. You only provide information on the hazard component, I think. Please specify what new insights your study provides with regard to flood hazard. Fig. 13: Please provide information on this in the method section, present in results and discuss later.

We replaced “risk” with “hazard” in the revision to be more consistent with our analysis. Regarding the methods, we suggest expanding the methods section with the following subsection that explains how we assess the influence of temporal clustering on discharge extremes:

***“Effects of temporal clustering of extreme precipitation on the occurrence and duration of extreme discharge***

*We analyse the influence of clusters of precipitation extremes on discharge in two ways: by looking at discharge characteristics after clusters of precipitation extremes, and at precipitation characteristics before periods of persistent high discharge.*

*First, we calculate for each catchment the average number of extreme discharge days during and up to 5 days after 21-day clusters of precipitation extremes. This number is then divided by the average number of extreme discharge days expected for periods of the same length and same time of the year as the selected cluster periods. This yields an "odds ratio" of extreme discharge occurrence after clusters of extremes. From the identification of 21-day cluster periods, precipitation extremes can also be separated into "clustered" and "non-clustered" events. We then look at the likelihood of extreme discharge occurrence after both types of events to highlight potential differences in the discharge response.*

*Second, for each of the persistent high-discharge periods identified as described previously, we calculate the number of precipitation extremes and the percentile of total accumulated precipitation in the 10 preceding days.”*

## **Specific comments**

Page 1 Line 9: "...magnitudes decrease more slowly after clustered events" Compared to what other type of events?

This is compared to non-clustered events. We may rephrase as “*In addition, discharge magnitudes decrease more slowly after clustered precipitation extremes than non-clustered ones.*”

Page 3 Line 70: "[...] scale of  $\approx 1000 \text{ km}^2$  catchments covering the whole of Switzerland." How many catchments? Please consider to rephrase this sentence.

The reference to the catchments is unnecessary here and we may rephrase as “*We then discuss the patterns and robustness of the spatio-temporal distribution of sub-seasonal clustering in Switzerland.*”

Page 3 Line 72-73: This description of the outline is not necessary in my view. You follow the typical structure and section titles are clear.

You are right, we will remove the corresponding sentences.

Page 3 Line 81: "63 catchments" It is 93, right?

The original manuscript was not clear about our use of two different sets of catchments, one for the hydrological analyses (gauged catchments for which discharge data is available, but which do not cover the whole of Switzerland) and one for the statistical clustering analyses (catchments that are not necessarily gauged but which provide a full partition of Switzerland). We added a subsection to the data section to highlight this point:

*“We average RhiresD data over a hydrological partitioning of Switzerland that consists of 63 catchments with a mean area of 900 km<sup>2</sup> (see Figure 4). Catchment-scale aggregation is useful to identify the occurrence of high-impact heavy precipitation events, and also to smooth RhiresD data to a lower resolution more consistent with its effective resolution. Though we could also use the set of 93 gauged catchments, this set does not cover the whole of Switzerland. Consequently, we opt for a countrywide partitioning of 63 larger catchments (for which no discharge observations are available). To be comprehensive and to help with the comparison of results, we also show in appendix the results obtained for the 93-catchment set.”*

Page 4 Line 104: remove "as"

Corrected, thanks

Page 5 Line 140: Please consider to add the subsection 3.1 Seasonality of heavy precipitation and floods at the catchment scale

We re-organized these paragraphs and moved them to the data/methods section under the heading “Study region”. These are not results, but a discussion of already existing knowledge on the seasonality of extreme precipitation and discharge across Switzerland (illustrated by Figures 2 and 3).

Figure 2: What are panels a-d? Please clarify in figure caption.

Thanks for noticing – we had forgotten to specify that panels corresponded to the four seasons: (a) DJF, (b) MAM, (c) JJA and (d) SON.

Page 5 Line 145: "Extreme precipitation events" 60 % of precipitation events means that 60 % of the values above the 99th percentile are located in a season, right? Please consider to explain again what your definition of "extreme precipitation event" is.

We agree that the wording was confusing. We now discuss Figures 2 and 3 before the methods section that introduces the definition of extreme precipitation events so as to avoid any confusion. In these figures we look at the seasonal frequency of exceedance of the fixed 99<sup>th</sup> daily precipitation percentile. So, a value of 60% indeed means that 60% of exceedances on average occur within the corresponding season.

Page 5 Line 148-154: This is discussion already, I think. Please consider moving this information into the discussion section.

This whole section is in fact essentially literature review which we illustrate with figures 2 and 3. We moved it outside of the results section to avoid confusion.

Page 6 Line 2: [...] due to heavier?

The sentence was reformulated as "*Alpine catchments, especially at high elevations, are mainly driven by snow- and glacier melt*".

Page 6 Line 159: "combination of saturated of frozen soil" Where can I see this in your analysis? Please focus on the presentation of your results here and discuss later.

As with one of your previous comments, this refers to previous literature and we moved the whole paragraph outside of the results section.

Page 6 Line 160: "floods" Values above the 99th percentile are not floods. Isn't high runoff values better?

You are correct that extreme discharge and floods (in the hydrological sense of the term) are not the same. We replaced the word "floods" by extreme discharge throughout the paper to avoid any confusion.

Page 6 Line 162: Where is the "Ticino area"?

The canton of Ticino is located in southern Switzerland. Since we did not specify it on a map, we replaced all references to that region by the slightly broader "Southern Alps" which we now define on Figure 1-b.

Page 6 Line 165-168: Please consider to move this paragraph into the discussion section. Focus on your results here

As with one of your previous comments, this refers to previous literature and we moved the whole paragraph outside of the results section.

Fig 4 and 5: You have a lot of figures. Isn't it possible to combine those two figures? E.g., significant areas full color and not significant one stripes?

Good suggestion, we combined Figures 4 and 5.

Page 6 Line 183-184: Please consider to move this into the discussion section. Focus on the presentation of your results here.

Good point.

Paragraph 3.2 – I find it hard to read this paragraph. The metrics used should be described in the method section already. Why do you select those metrics? You jump a lot between figures here, I think. Please try to organize the result sections better, so it is easier to follow.

We agree and added details of the selected cluster metrics to the methods section as follows: *“We characterize clusters of precipitation extremes with two metrics related to their potential impacts. The first is the average contribution of cluster periods to seasonal precipitation. This contribution increases with the frequency and total precipitation of cluster periods. The second metric is the frequency of cluster periods in extreme 21-day precipitation accumulations. It gives an idea of how often cluster periods are responsible for extreme precipitation accumulations, a frequent trigger of flood events (Froidevaux et al. 2015)”*.

Regarding paragraph 3.2, we suggest reformulating it as follows: *“We now expand the statistical analysis by showing the characteristics of clustered precipitation events. In winter, extreme precipitation clusters contribute an average of  $\approx 10\%$  to total winter precipitation along the Alpine ridge where clustering is statistically significant (Figure 7-a). Additionally, clusters occur during about 60-70% of extreme 21-day precipitation accumulations (above the corresponding 99th percentile) (Figure 8-a). Elsewhere, clusters contribute little both to seasonal and extreme precipitation accumulations. In spring, the average contribution of clusters to seasonal precipitation is overall weak ( $< 10\%$ ), even for catchments where clustering in RhiresD is statistically significant (Figure 7-b). Yet, over Western Switzerland, periods of extreme 21-day accumulations are almost always cluster periods as well (Figure 8-b). In summer, consistent with the absence of clustering at that time of the year, clusters are not contributing much to seasonal precipitation. Finally, in fall, cluster contribution to seasonal precipitation reaches its annual maxima of 12-16% over Southeastern Switzerland (particularly the Southern Alps). It is also quite high ( $\geq 10\%$ ) over Western Switzerland where clustering is statistically significant as well (Figure 7-d). In addition, more than 80% of extreme precipitation accumulation periods are accompanied by cluster events in the Southern Alps (Figure 8-d). Since extreme discharge in this area are most common during fall (Figure 3-d), this suggests a possibly important role of extreme precipitation clusters in high-impact weather events in this region and at that time of the year.”*

Page 7 Line 207: "Unsurprisingly"?

The word could be deleted.

Page 7 Line 209: Start new sentence here.

A new sentence could indeed be added: *“This is a clear signature of the glacial/nival runoff regime dominance above that altitude.”*

Page 7 Line 214-216: Please concentrate on the description of your results here. Discuss later.

These sentences still describe results (Figure 13) but should be reformulated to make it clearer. Please see revised section 3.3 “Discharge response to extreme precipitation clustering”.

Page 7 Line 219: "20-30 %". This seems low to me. What about the rest?

This figure is not low – note that we are not considering probabilities that sum to 1 here (there is no “rest” to consider). Instead, we look at exceedances of the 99<sup>th</sup> discharge percentile during the 5 days following an extreme event. So, 20-30% of days means that on average the 99<sup>th</sup> discharge percentile will be exceeded during 1-1.5 days after an event. 99<sup>th</sup> percentiles are exceeded on average ~3 times per year, so our results imply an important effect. We added a sentence to point this out in the text.

Page 7 Line 220: "The occurrence [...]" Move to discussion?

This sentence is still describing results (Figure 12), but is discussed further in the discussion.

Page 8 Line 221-225: This is a key sentence of your study, I think.

Yes, and we now include it in the abstract as well.

Page 8 Line 240: What is "IVT"?

Sorry for that oversight. IVT stands for ‘Integrated Vapour Transport’. We propose to reformulate the sentence as follows: *“During winter, extreme precipitation events in northern Switzerland usually occur in connection with extreme integrated water vapour transport with convergence onto the orography, for instance linked to atmospheric rivers.”*

Page 8 Line 249: What is "PV"?

PV (potential vorticity) was defined at l. 153 but since we use the acronym only twice we can simply say “potential vorticity”.

Section 4.2 title: Replace "flood risk" with "flooding"?

We can replace “flood risk” by “flooding hazard”.

Page 9 Line 264: Where do you show the analysis on "major floods"?

We do not show it explicitly; with this sentence we argue that our results suggest a role for temporal clustering in major flood events. Still, in the original manuscript the sentence was misplaced. We suggest moving it to the paragraph of section 4.2 discussing the case of southern Switzerland.

Page 9 Line 266: "runoff regimes at lower elevation" You mean pluvial-type rivers? Rainfall-dominated? You say rainfall is important in rainfall-dominated rivers?

We did mean pluvial-type regimes and we will specify it in the revision.

Page 9 Line 284: needs to be focus of further research?

Good suggestion.

Page 10 Line 300: Why is the same water level in winter more damaging than in summer?

We realise that this sentence was confusing. We did not intend to say that the same water level is necessarily more damaging in winter than in summer. Rather, in this sentence we argue that to define floods based on fixed discharge percentiles (no seasonal variation) potentially overlooks some high-discharge events outside of summer in glaciated/snow-driven catchments. So it isn't that the same water level is necessarily more damaging in winter than in summer, but that very high discharge events in winter (just below the summer peaks) may still be quite damaging. We suggest reformulating the text as follows: "*While from the perspective of impacts it makes sense to define floods based on annual discharge percentiles, in snow-driven or glaciated catchments, this choice may discard potential high-discharge conditions occurring outside summer.*"

Page 10 Line 307: "Clustering is most significant over the Alps in winter." Why?

Good question! It is beyond the scope of this study, which only seeks to characterize the statistics of temporal clustering, but obviously it raises the question of why clustering occurs more frequently over the Alps in winter and the Southern Alps in fall. Most likely the clustering is related to the persistence of specific regional/North Atlantic weather patterns leading to intense moisture transport towards the Alps.

Figure 9: How/Why do you calculate the average cumulative precipitation quantile?

We had not explained this calculation in detail. To analyse the influence of clusters of precipitation extremes on discharge, we take two approaches: the first is to look at discharge characteristics after clusters of precipitation extremes, and the second to look at precipitation before periods of persistent high discharge. Cumulative precipitation percentiles are useful to characterise the precipitation before periods of persistent high discharge. In practice, for each of the persistent high-discharge periods (identified using (L,N) values), we calculate the number of precipitation extremes and the percentile of total accumulated precipitation in the

10 preceding days. We added these details to the methods section under “Effects of temporal clustering of extreme precipitation on the occurrence and duration of extreme discharge”.

Figure 10: Describe panel b) in figure caption.

Sorry for the oversight. Panel (b) is the same as panel (a) but for the number of extreme precipitation events.
